# Supplementary material for: Swimming, gliding, and rolling toward the mainstream: cell biology of marine protists
Source: PubMed Central journal article supplement — Mol Biol Cell. 2019 May 15;30(11):1245–8. doi: 10.1091/mbc.E18-11-0724 (PMC6724603; doi:10.1091/mbc.e18-11-0724), 2019-05-15
Supplement: mbc-30-1245-s001.pdf [file mbc-30-1245-s001.pdf]

# Supplemental Materials

*Molecular Biology of the Cell*

Collier and Rest
